# Supplementary material for: Comparison of Microbiota Variation in Korean Healthy Adolescents with Adults Suggests Notable Maturity Differences
Source: PubMed Central journal article supplement (PMC6338580; doi:10.1089/omi.2018.0146), 2018-12-19

**Comparison of microbiota variation in Korean healthy adolescents with adults suggests notable maturity differences.**

## **Supplementary Information**

**Supplementary Table 1**  
**Supplementary Figures 1 through 7**

**Supplementary Table 1. Top 20 for statistically significant different OTUs between KAHSS and HMPHSs .**

| OTU ID  | P-value | FDR_P | KAHSS    | HMPHSs   | Taxonomy           |
|---------|---------|-------|----------|----------|--------------------|
| 210155  | 0       | 0     | 71.12121 | 0.704969 | g__Bacteroides     |
| 303791  | 0       | 0     | 1.212121 | 59.96273 | g__Bacteroides     |
| 356687  | 0       | 0     | 2.393939 | 194.677  | g__Bacteroides     |
| 169775  | 0       | 0     | 0.181818 | 70.47826 | g__Bacteroides     |
| 4479835 | 0       | 0     | 0        | 57.68944 | g__Bacteroides     |
| 260579  | 0       | 0     | 1.606061 | 63.74845 | g__Alistipes       |
| 179412  | 0       | 0     | 0.242424 | 75.6677  | g__Bacteroides     |
| 4484395 | 0       | 0     | 0        | 54.01863 | g__Bacteroides     |
| 183603  | 0       | 0     | 114.7576 | 6.692547 | g__Bacteroides     |
| 307571  | 0       | 0     | 81.18182 | 0.695652 | g__Prevotella      |
| 130228  | 0       | 0     | 0.666667 | 56.04348 | g__Bacteroides     |
| 2097828 | 0       | 0     | 59.66667 | 0.068323 | g__Bacteroides     |
| 210939  | 0       | 0     | 111.3333 | 12.9441  | g__Bacteroides     |
| 4374912 | 0       | 0     | 0.272727 | 78.53727 | g__Parabacteroides |
| 844958  | 0       | 0     | 7.69697  | 229.354  | g__Bacteroides     |
| 292640  | 0       | 0     | 112.7273 | 11.68323 | g__Prevotella      |
| 1906483 | 0       | 0     | 0.030303 | 56.61491 | g__Bacteroides     |
| 586379  | 0       | 0     | 1.272727 | 92.70186 | g__Bacteroides     |
| 360058  | 0       | 0     | 116.1515 | 0.419255 | g__Bacteroides     |
| 1935192 | 0       | 0     | 0        | 52.77019 | g__Bacteroides     |

**Supplementary Figure 1. An overview of data analysis in our study.**

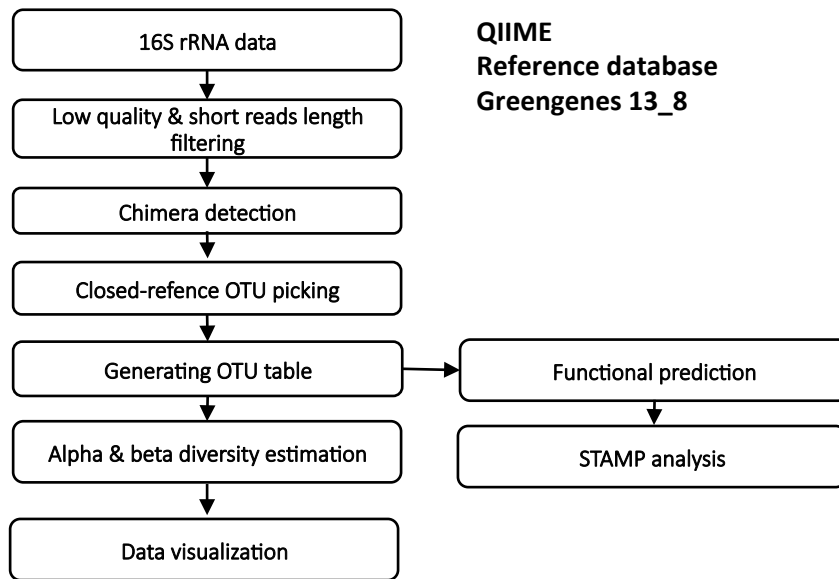

**Supplementary Figure 2. PICRUSt functional results of cellular processes, genetic information processing, and organismal system between HMPHSs and KAHSs.**

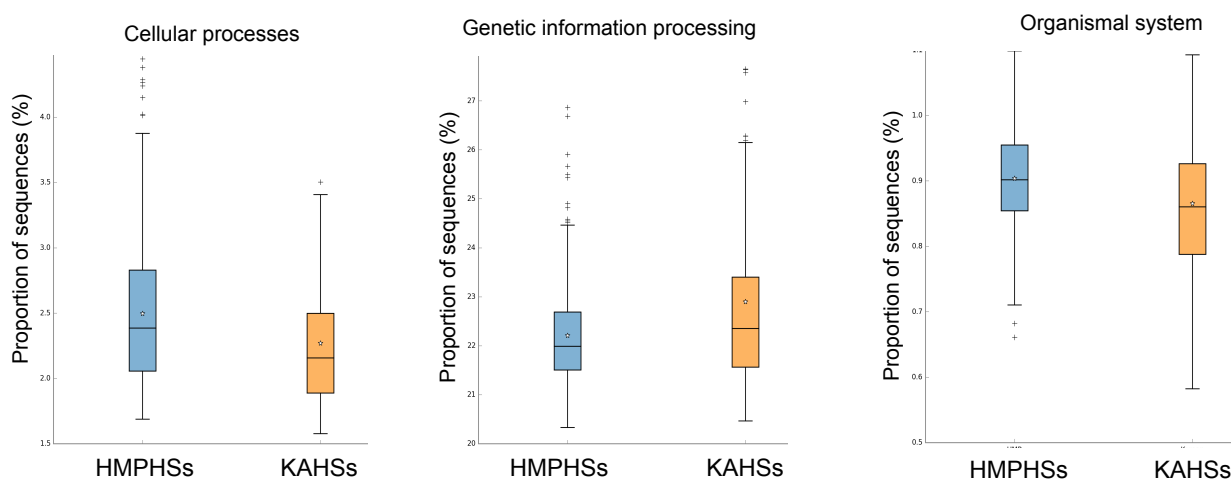

| Feature                        | Eta-squared | P-value | Corrected p-value |
|--------------------------------|-------------|---------|-------------------|
| Cellular processes             | 0.025       | 1.56e-3 | 1.56e-3           |
| Genetic information processing | 0.043       | 3.38e-5 | 3.38e-5           |
| Organismal system              | 0.032       | 3.80e-4 | 3.80e-4           |

**Supplementary Figure 3. Phylum-level association (co-occurrence) networks of KAHSs and HMPHSs.**

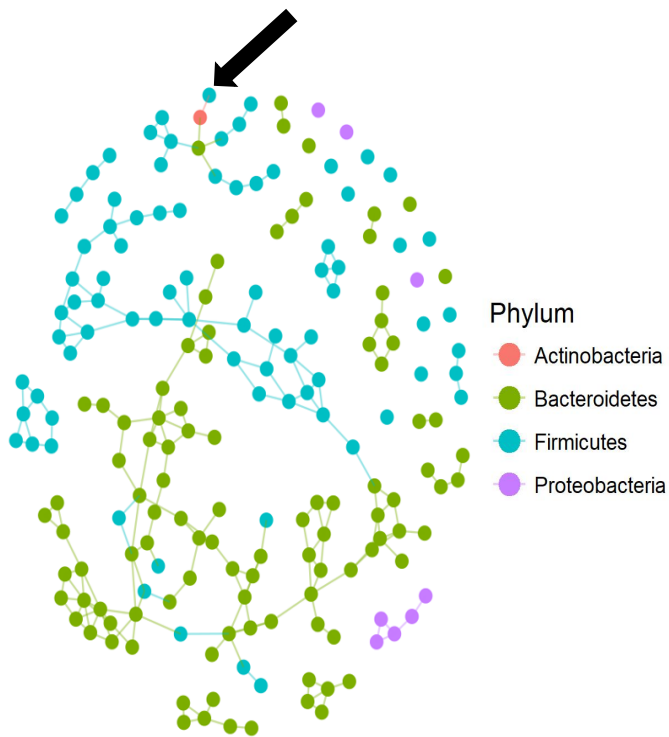

**KAHSs – Phylum level**

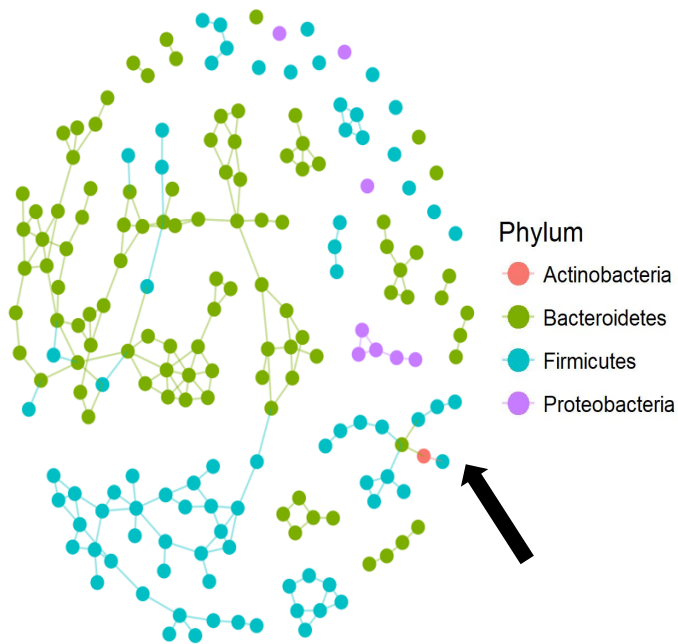

**HMPHSs – Phylum level**

**Supplementary Figure 4. Full genus-level association networks of KPHSs and HMPHSs.**  
 In the networks, edges indicates associations among taxa in terms of co-occurrences of neighboring taxa. Figure 4 was a subset of this figure.

**KAHSs – genus level**

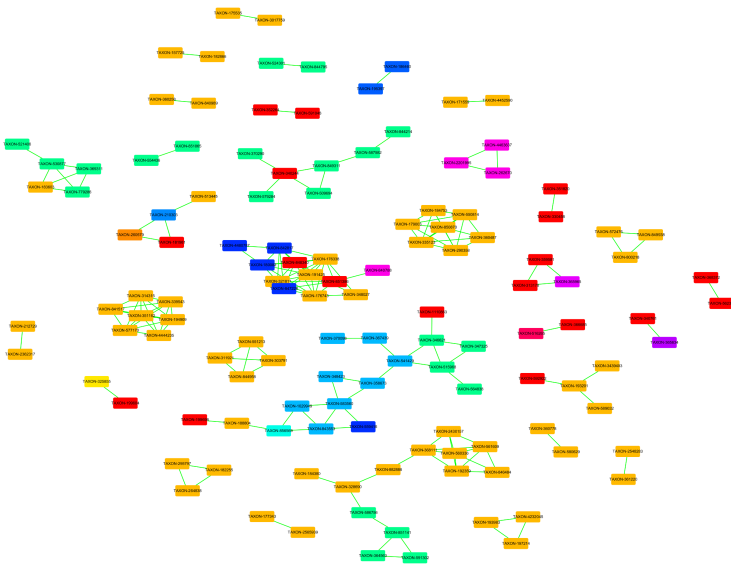

**HMPHSs – genus level**

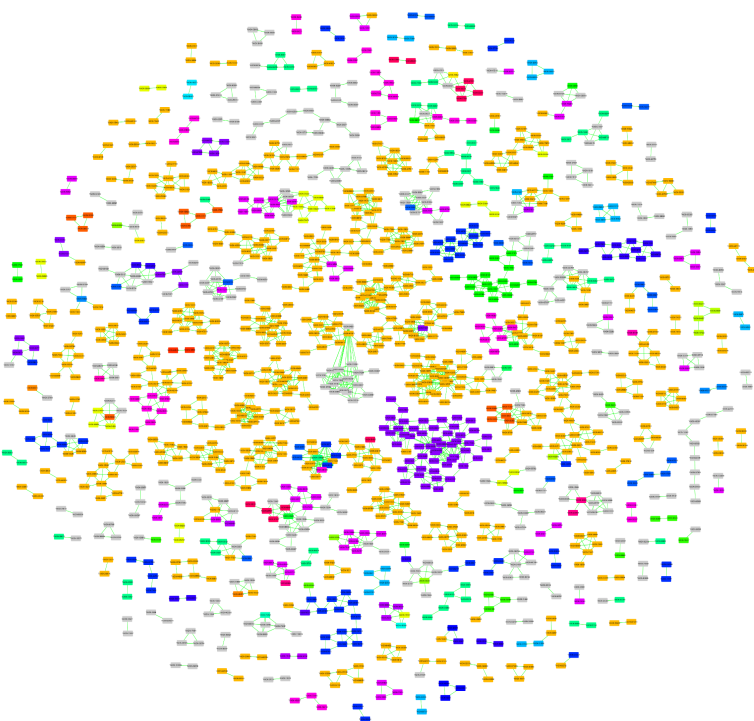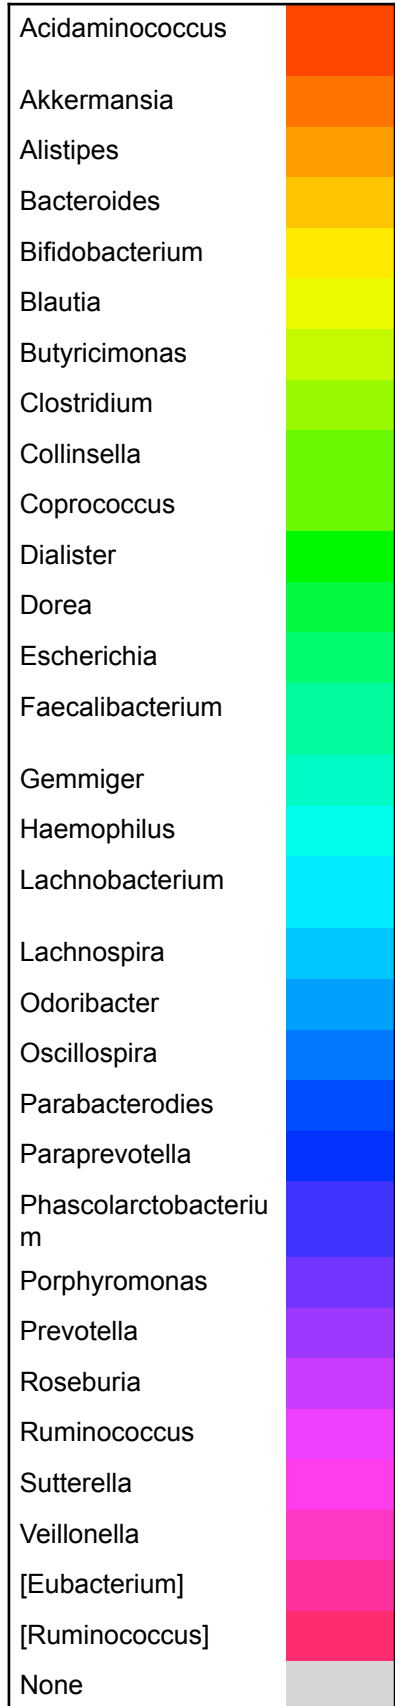

**Supplementary Figure 5. Associations among different taxa in genus level networks of KAHSSs and HMPHSs.** For example, the number of intersection is three which indicate three association among different taxa: bacteroides-faecalibacterium, parabacteroides-sutterella, and bacteroides-parabacteroides.

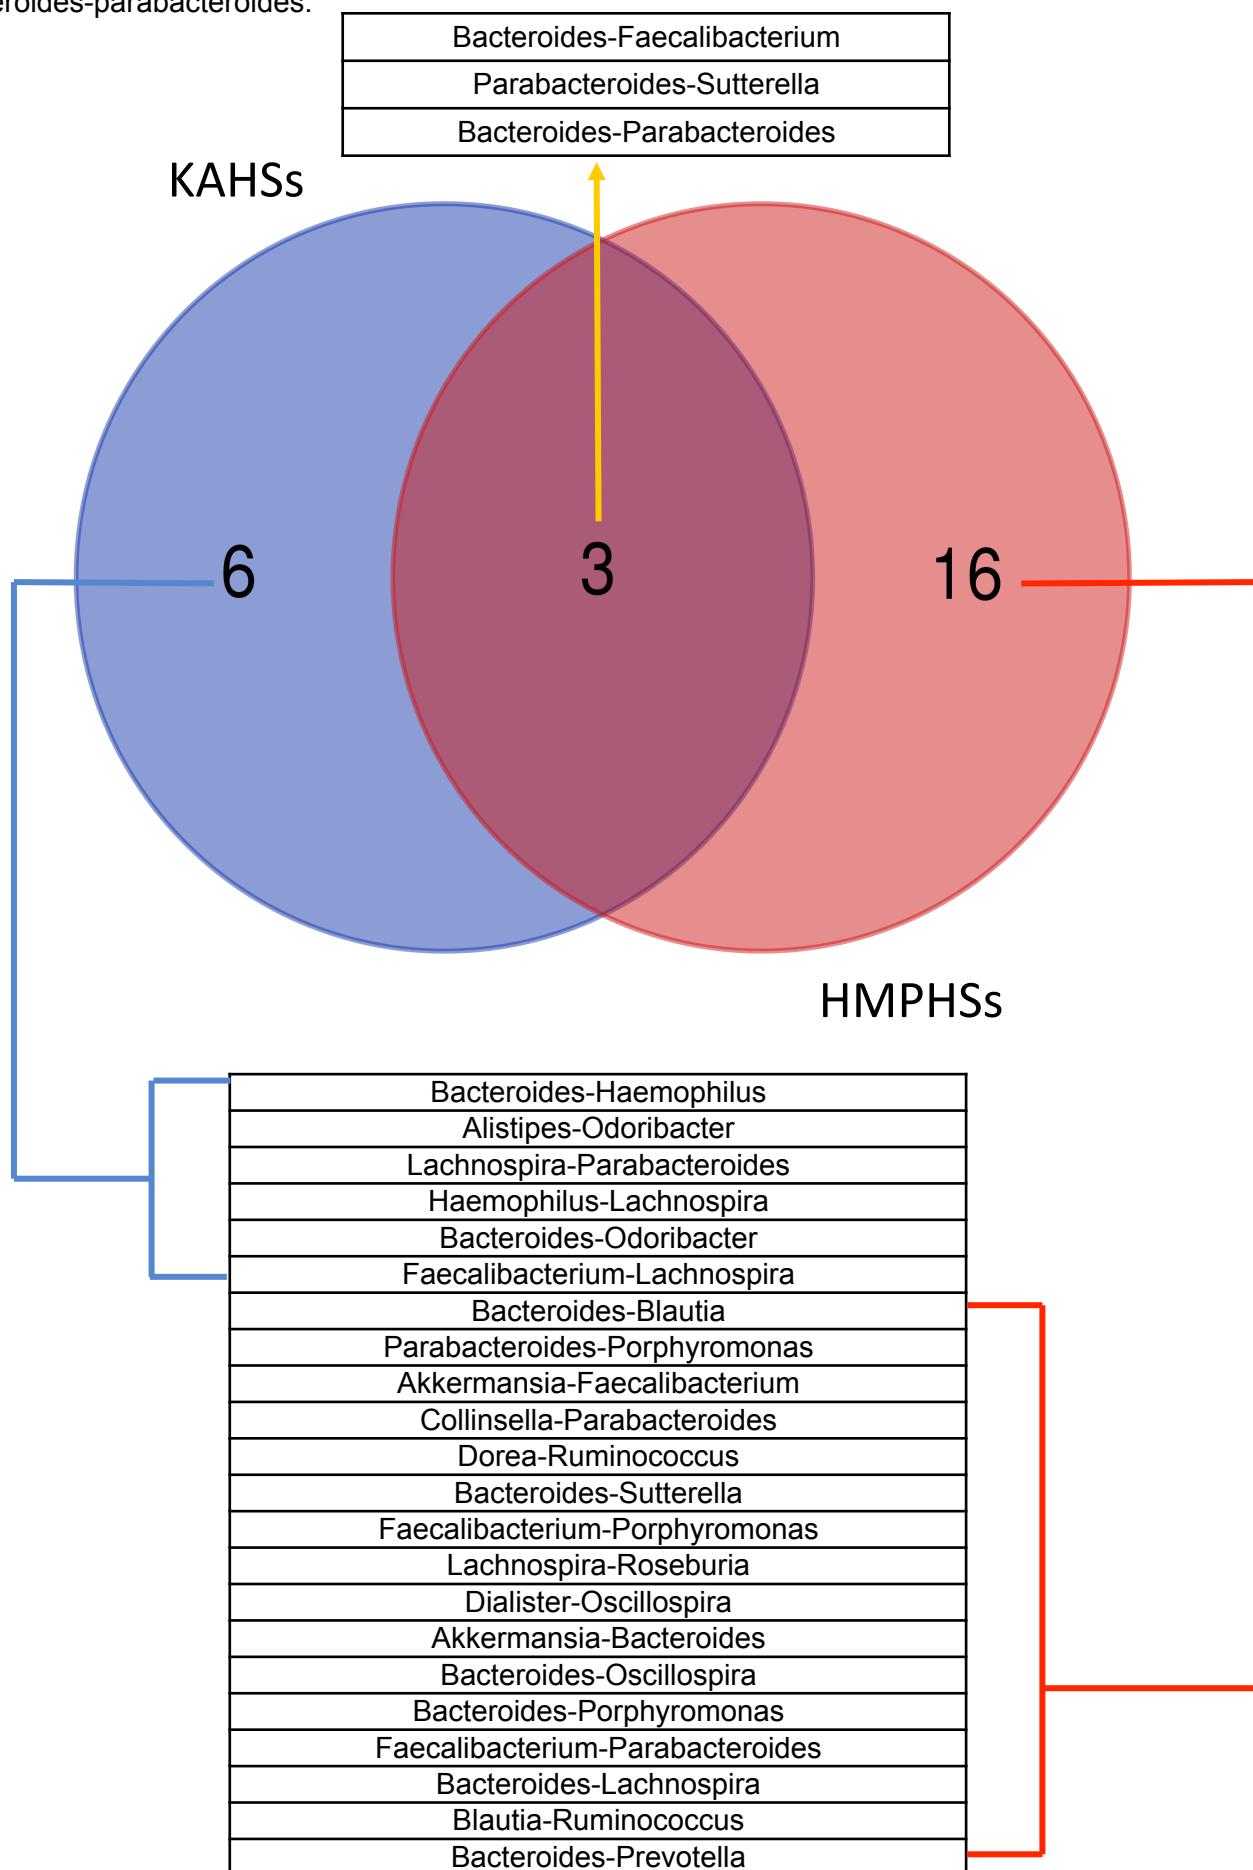

**Supplementary Figure 6. PCoA plots for comparing (A) KAHSs with HKAs, and (B) KAHSs and IAHSs. KAHSs and HKAs are closely clustered more than KAHSs and IAHSs.**

**A**

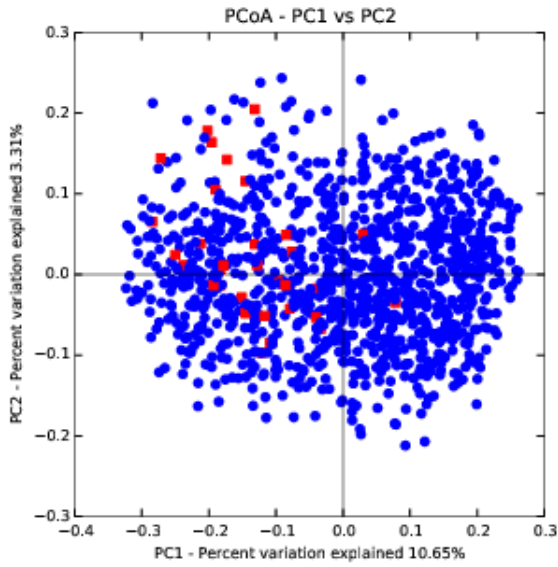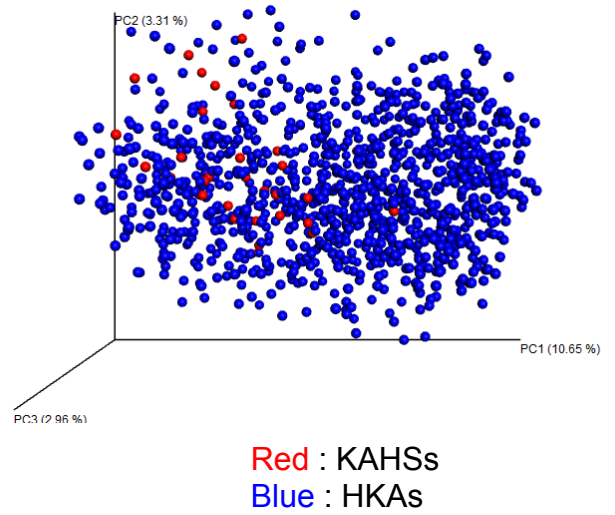

**B**

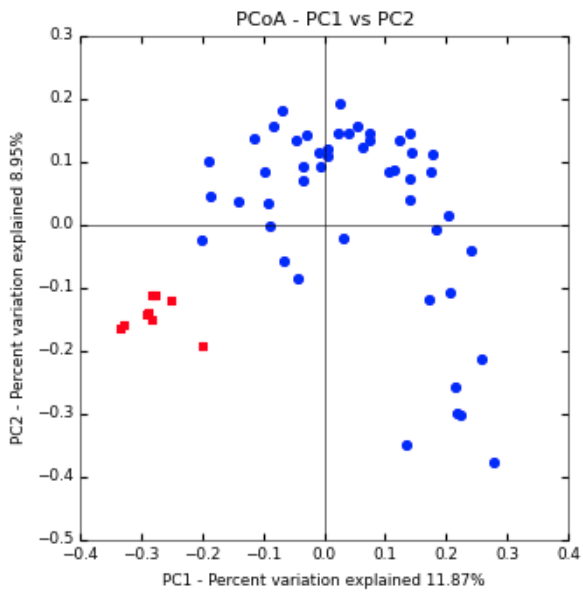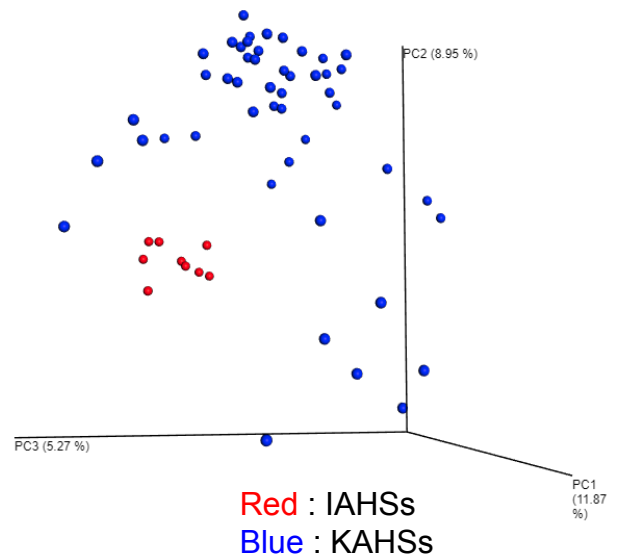



Supplementary Figure 7. Taxonomy composition plots for IAHSs and KHASs.

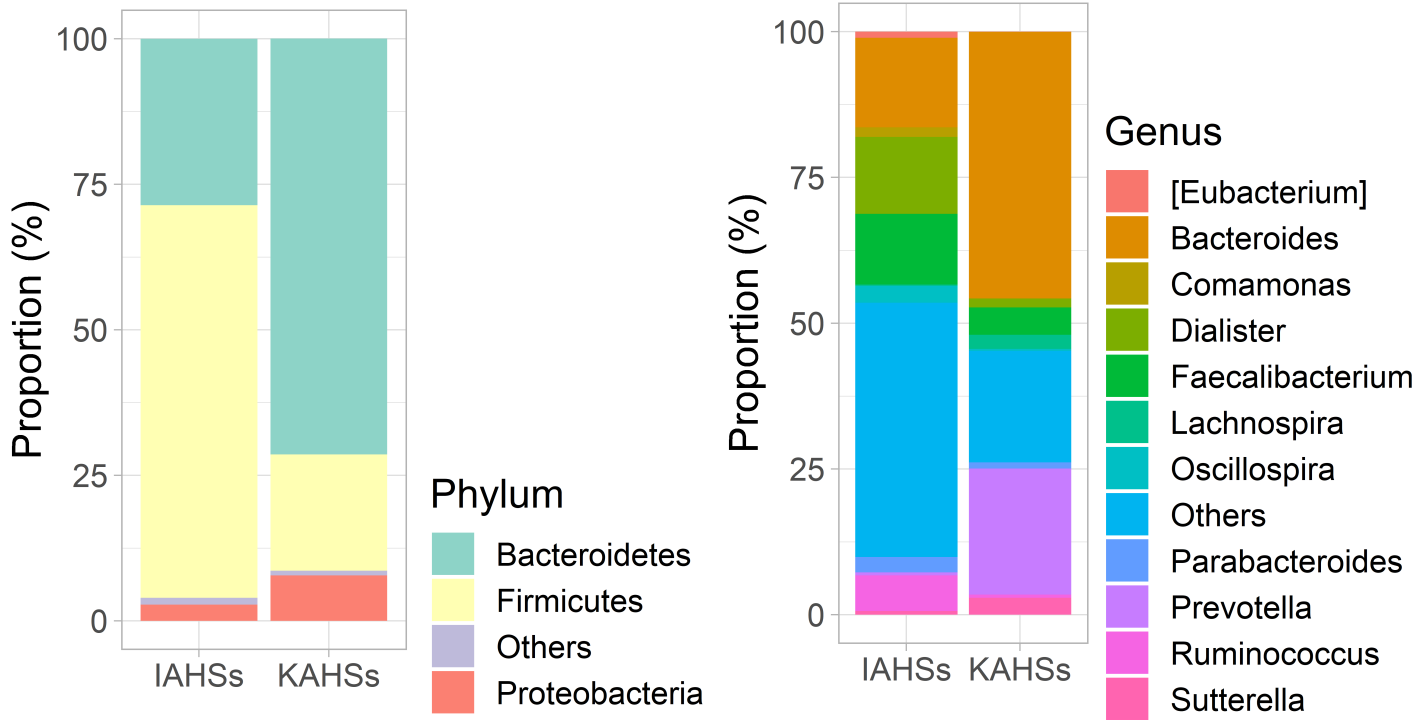

Supplement: Supp_Data.pdf [file Supp_Data.pdf]
